# Supplementary material
Source: Springer Nature journal article supplement (https://www.springermedizin.de/resource/supplementary/12887_2010_391_MOESM1_ESM.pdf/9475008)
Supplement: MOESM1 [file 9475008]

# Cerebral Palsy

## Body functions and structures

- Physical fitness
- Spasticity
- Selectivity
- Fatigue

## Activities

- Objective level of PA
- Self reported level of PA
- Manual ability
- Gross motor functioning
- Sports activities

## Participation

- Social participation

## Quality of life

- Health related quality of life

## Personal factors

- Age
- Gender
- Level of education
- Attitude towards PA
- General self efficacy
- Intrinsic motivation

## Environmental factors

- Social support for exercise behavior
